Lermi (2021)

1 **Title Page**

2 **Comparative Molecular Genomic Analyses of a Spontaneous Rhesus Macaque Model of**  
3 **Mismatch Repair-Deficient Colorectal Cancer**

4  
5 **Authors:** Nejla Ozirmak Lermi<sup>1,6</sup>, Stanton B. Gray<sup>4</sup>, Charles M. Bowen<sup>1</sup>, Laura Reyes-Uribe<sup>1</sup>,  
6 Beth K. Dray<sup>8</sup>, Nan Deng<sup>1</sup>, R. Alan Harris<sup>7</sup>, Muthuswamy Raveendran<sup>7</sup>, Fernando Benavides<sup>2</sup>, Carolyn L.  
7 Hodo<sup>4</sup>, Melissa W. Taggart<sup>3</sup>, Karen Colbert Maresso<sup>1</sup>, Krishna M. Sinha<sup>1</sup>, Jeffrey Rogers<sup>7</sup>,  
8 and Eduardo Vilar<sup>1,5\*</sup>

9  
10 **Affiliations:** Departments of <sup>1</sup>Clinical Cancer Prevention, <sup>2</sup>Epigenetics and Molecular Carcinogenesis,  
11 <sup>3</sup>Pathology; <sup>4</sup>Comparative Medicine and Michale E. Keeling Center for Comparative Medicine and  
12 Research; <sup>5</sup>Clinical Cancer Genetics Program; <sup>6</sup>School of Health Professions, The University of Texas  
13 MD Anderson Cancer Center, Houston, TX; <sup>7</sup>Human Genome Sequencing Center and Department of  
14 Molecular and Human Genetics, Baylor College of Medicine, Houston, TX; <sup>8</sup>Charles River Laboratories,  
15 Ashland, OH.

16  
17 **Running Title:** Comparative Genomic Analysis of Colorectal Cancers in Rhesus

18  
19 **\*Corresponding Author:** Eduardo Vilar, MD, PhD, Clinical Cancer Prevention – Unit 1360, The  
20 University of Texas MD Anderson Cancer Center, PO Box 301439, Houston, TX 77230-1439; P: (713)  
21 745-4929; F: (713) 794-4403; E-mail: [EVilar@mdanderson.org](mailto:EVilar@mdanderson.org)

22  
23 **Abbreviations:** CRC, colorectal cancer; CSC, cancer stem cell; Colorectal adenocarcinoma, COAD;  
24 DEGs, differentially expressed genes; FAP, familial adenomatous polyposis; GSEA, gene set enrichment  
25 analysis; H&E, hematoxylin and eosin; Het, heterozygous; IHC, immunohistochemistry; LS, Lynch

Lermi (2021)

26 Syndrome; MMRd, mismatch repair-deficient; MMRp, MMR-proficient; NES, normalized enrichment  
27 score; RNAseq, RNA sequencing; MDACC, The University of Texas MD Anderson Cancer Center; The  
28 Cancer Genome Atlas, TCGA; READ, rectal adenocarcinoma.

29

### 30 **Declarations**

31 All animal experiments were conducted in compliance with the National Institutes of Health guidelines  
32 for animal research and approved by MDACC Institutional Animal Care and Use Committee (IACUC,  
33 Protocol #0804-RN02).

34

35 **Availability of data and materials:** Data are available upon reasonable requests directed to the  
36 corresponding author. (See Corresponding Author section, above).

37

38 **Conflict of Interest Disclosures:** Dr. Vilar has a consulting or advisory role with Janssen Research and  
39 Development and Recursion Pharma. He has received research support from Janssen Research and  
40 Development.

41

42 **Funding/Support:** This work was supported by a gift from the Feinberg Family Foundation and  
43 MDACC Institutional Research Grant (IRG) Program to E.V.; MD Anderson Internal Grant Award from  
44 Cattlemen for Cancer Research to S.G.; R24 OD011173 (US National Institutes of Health) to J.R.; and  
45 CA016672 (US National Institutes of Health/National Cancer Institute) to The University of Texas MD  
46 Anderson Cancer Center Core Support Grant.

47

48 **Manuscript (without Figure Legends and References):** 5409

49 **Abstract:** 205

50 **Number of references:** 41

Lermi (2021)

51 **Number of Figures:** 5

52 **Number of Supplementary Figures and Tables:** 7 Figures, 3 Tables

Lermi (2021)

53 **Abstract**

54 Colorectal cancer (CRC) remains the third most common cancer in the US with 15% of cases displaying  
55 Microsatellite Instability (MSI) secondary to Lynch Syndrome (LS) or somatic hypermethylation of the  
56 *MLH1* promoter. A cohort of rhesus macaques from our institution developed spontaneous mismatch  
57 repair deficient (MMRd) CRC with a notable fraction harboring a pathogenic germline mutation in *MLH1*  
58 (c.1029C<G, p.Tyr343Ter). Our study incorporated a detailed molecular characterization of rhesus CRC  
59 for cross-comparison with human MMRd CRC. We performed PCR-based MSI testing, transcriptomic  
60 analysis, and reduced-representation bisulfite sequencing (RRBS) of rhesus CRC (n=41 samples) using  
61 next-generation sequencing (NGS). Systems biology pipelines were used for gene set enrichment analysis  
62 (GSEA) for pathway discovery, consensus molecular subtyping (CMS), and somatic mutation profiling.  
63 Overall, the majority of rhesus tumors displayed high levels of MSI (MSI-high) and differential gene  
64 expression profiles that were consistent with known deregulated pathways in human CRC. DNA  
65 methylation analysis exposed differentially methylated patterns among MSI-H, MSI-L (MSI-low)/MSS  
66 (MS-stable) and LS tumors with *MLH1* predominantly inactivated among sporadic MSI-H CRCs. The  
67 findings from this study support the use of rhesus macaques as the preferred animal model to study  
68 carcinogenesis, develop immunotherapies and vaccines, and implement chemoprevention approaches  
69 pertinent to sporadic MSI-H and LS CRC in humans.

70

71 **Keywords:** Rhesus macaque, Colorectal cancer, Lynch syndrome, Microsatellite instability, Next-  
72 generation sequencing, Bioinformatics, Epigenetics

Lermi (2021)

## 73 **Introduction**

74 Colorectal cancer (CRC) remains the third leading cause of cancer-related deaths affecting both men and  
75 women (1). Approximately 15% of CRC cases display microsatellite instability (MSI) secondary to a  
76 defective mismatch repair (MMRd) system that is recognized as a major carcinogenic pathway for CRC  
77 development. MMRd arises as a result of either (1) an inherited germline mutation in one of four genes  
78 (*MLH1*, *MSH2*, *MSH6* and *PMS2*) constituting the MMR system followed by an acquired second-hit in  
79 the wild-type allele of the same gene in colonic mucosa cells (i.e., Lynch syndrome) or (2) somatic  
80 inactivation of the *MLH1* gene (i.e., MSI sporadic CRC).

81  
82 A better understanding of colorectal neoplasia arising in the setting of MSI/MMRd is urgently needed to  
83 tailor the use of early detection, prevention, and treatment interventions in this subset of CRC, including  
84 established immunotherapies and the development of novel immuno-preventive regimens. Such  
85 interventions are particularly needed for those with Lynch syndrome, as they are at the highest risk of  
86 CRC as well as a range of other cancers. Unfortunately, no concrete model with higher translational value  
87 exists to study the nuanced carcinogenesis of MMRd CRC, which is a critical barrier for studying this  
88 subset of CRC and, consequently, to making advances in its detection, prevention, and treatment.

89  
90 Presently, *in vitro* and *ex vivo* models, such as cell lines and organoids respectively, are commonly used  
91 to study CRC; however, the intrinsic nature of these models lack cellular heterogeneity and fail to  
92 recapitulate the tumor microenvironment (TME) observed *in-vivo* (2). To combat the limitations of *in-*  
93 *vitro/ex-vivo* cultures, mouse models (*Mus musculus*) have been leveraged to study CRC prevention,  
94 initiation, and progression. Although murine models of genetic inactivation of MMR genes exist, these  
95 models drastically diverge from the human LS (MMRd) phenotype. For example, murine models with  
96 constitutional homozygous MMR gene inactivation have high rates of lymphoma formation, limiting the  
97 efficacy of these models. In an effort to circumvent this challenge, investigators have employed tissue-  
98 specific Cre recombinase-based inactivation of MMR genes; however, these mice predominantly develop

Lermi (2021)

99 tumors in the small intestine (as opposed to the large intestine in humans) (3). These limitations of  
100 cellular cultures and murine models warrant the need for better model systems to elucidate the intrinsic  
101 and extrinsic factors of MMRd carcinogenesis to help improve clinical outcomes for both LS and MSI  
102 sporadic patients.

103  
104 Given the anatomic and physiologic similarities and genomic homology between non-human primates  
105 (NHPs) and humans, researchers have used several species of NHPs to develop therapies and vaccines to  
106 treat and eradicate human disease (4, 5). The rhesus macaque (*Macaca mulatta*), which shares 97.5%  
107 DNA sequence identity with humans in exons of protein-coding genes as well as close similarity in  
108 patterns of gene expression, has been an invaluable animal model for studying human pathophysiology (6,  
109 7). Studies have shown that rhesus launch parallel immune responses and display analogous pathologies  
110 to humans, thus making them ideal animal models suited for clinical translation of basic and pre-clinical  
111 findings compared to other model organisms (8-11).

112  
113 A cohort of specific pathogen free (SPF), Indian-origin rhesus macaques bred at The University of Texas  
114 MD Anderson Cancer Center (MDACC) Michale E. Keeling Center for Comparative Medicine and  
115 Research (KCCMR) spontaneously develops MSI/MMRd CRC, including a subset of animals harboring a  
116 pathogenic germline mutation in *MLH1* (c.1029C<G, p.Tyr343Ter). This spontaneous mutation manifests  
117 into clinical and pathological features similar to human LS, which suggests that these rhesus macaques  
118 may be a superior model organism for studying MMRd CRC (10, 12).

119  
120 This study characterized the genomic features of colorectal tumors in the KCCMR rhesus cohort using  
121 microsatellite marker testing, whole transcriptomics, and epigenomics coupled with systems biology  
122 tools, as illustrated in **Figure 1**. Additionally, we cross-compared the current subtypes of CRC in humans  
123 with the rhesus model to evaluate the utility of rhesus for studying early cancer development, treatment  
124 modalities, and prevention approaches in hereditary and sporadic CRC.

Lermi (2021)

## 125 **Results**

126 **Clinical characteristics of colorectal tumors in rhesus.** We identified a total of 41 animals diagnosed  
127 with CRC at the time of necropsy. All tumors were located in the right side of the colon (20 in the  
128 ascending colon, 16 in the ileocecal valve, and 4 in the cecum) with the exception of one jejunal tumor.  
129 The mean age at death was 19.3 years (range: 9 and 27 years, **Figure 2A**) and 80% of animals were  
130 female (**Figure 2B**), consistent with overall population demographics of approximately 80% females  
131 from which the CRC animals were drawn. The average age at death was younger among the LS macaques  
132 than among the sporadic MSI macaques, but the difference is not statistically significant (17.75 vs 19.75  
133 years,  $P$ -value=0.3, **Figure S1**).

134

## 135 **Germline Genetics**

136 We detected the presence of a previously described heterozygous germline stop codon mutation in exon  
137 11 of *MLH1* (c.1029C>G; p.Tyr343Ter, **Figure 2C, Figure S2 and Table S1**) in 8 animals (~20%) from  
138 KCCMR (10), thus confirming the presence of a causative pathogenic mutation of Lynch syndrome in  
139 humans (herein referred to as rhesus Lynch) (12). The remaining 33 animals (80%) had the wild-type  
140 germline variant of *MLH1* (herein referred to as rhesus sporadic, **Figure 2C**).

141

## 142 **Immunohistochemistry (IHC) staining displayed widespread loss of expression in MLH1 and PMS2**

143 **in rhesus CRC.** Of the rhesus CRCs with IHC data (n=37), 36 samples (97%) had loss of MLH1 and/or  
144 PMS2 protein expression. Only one animal (~3%) retained the expression of the MLH1-PMS2  
145 heterodimer. This same animal also displayed complete stability of the MSI markers, thus being MSS,  
146 and therefore, was considered MMR proficient. We subsequently used this animal as a control for all  
147 further genomic analyses (**Figure 2D**).

148

149 **Assessment of MSI in rhesus CRC.** We developed an MSI testing panel for rhesus CRC including  
150 orthologs of the most frequently used microsatellite markers in human CRC: BAT25, BAT26, BAT40,

Lermi (2021)

151 D10S197, D18S58, D2S123, D17S250, D5S346,  $\beta$ -catenin, and TGF $\beta$ RII. Rhesus orthologs of D2S123,  
152 D17S250, and D5S346 markers did not contain adequate nucleotide repeats suitable to assess the  
153 presence of MSI. Hence, we excluded these markers from the rhesus MSI testing panel. Furthermore, the  
154 rhesus ortholog of BAT25 was not sensitive enough to determine MSI in rhesus CRC due to the  
155 interruption of the microsatellite by a nucleotide. Therefore, we substituted it with a novel MSI marker—  
156 c-kitRheBAT25—identified through screening the whole sequence of the *c-kit* gene for an uninterrupted  
157 repeat region. Overall, the rhesus CRC MSI testing panel included 6 markers: 4 mononucleotide (c-  
158 kitRheBAT25, RheBAT26, RheBAT40, RheTGF $\beta$ RII) and 2 dinucleotide (RheD18S58, RheD10S197)  
159 markers (**Table S1**). This panel offers an assessment of the functionality of the MMR system in these  
160 rhesus macaques.

161  
162 With the newly designed rhesus MSI panel, we performed MSI testing of tumors from the entire KCCMR  
163 cohort and used matched normal samples as a genomic reference (n=41). c-kitRheBAT25, RheBAT26,  
164 and RheD18S58 markers were the most sensitive (**Figure 2E**). We validated the calls made in RheBAT26  
165 and RheD18S58 using an alternative technique based on fragment analysis (**Figure S3**). We classified  
166 rhesus tumors into three categories—MSI-H, MSI-L, MSS—by counting the number of unstable markers  
167 in each tumor and abided by classical NCI recommendations (13). Thirty-one samples were MSI-H (76%,  
168 herein referred to as rhesus sporadic MSI), six were MSI-L (15%), and four were MSS (10%) (**Figure**  
169 **2F**).

170  
171 **DNA methylation was responsible for developing CRC in the rhesus.** As seen in human MSI CRC,  
172 the phenotype of rhesus MSI-H CRC determined from MSI testing and transcriptomic profiling suggests  
173 a vast majority of rhesus CRC may involve an epigenetic event. To determine the epigenetic contribution  
174 to rhesus CRC, we analyzed the global DNA methylation patterns in tumor and normal samples.  
175 Unsupervised principal component analysis (PCA) of reduced-representation bisulfite sequencing  
176 (RRBS) data revealed clear clustering of MSI-H, MSI-L/MSS, and Lynch syndrome tumors, as well as



Lermi (2021)

177 normal mucosa (**Figure 3A**). Hierarchical clustering of DNA methylation profiles using Pearson's  
178 correlation distance displayed a clear separation between rhesus tumor and matched normal tissue  
179 samples. Rhesus MSI-H tumor tissue samples clustered together with rhesus LS and separated from  
180 normal and rhesus MSS/MSI-L CRC (**Figure 3B**). Significant differentially methylated regions (DMRs)  
181 between rhesus normal and tumor tissue samples using a FDR of 5% involved the following genes:  
182 *TOP1*, *PCGF3*, and *FAM76B* (hypermethylated), and *ALKBH5*, *GAS8*, and *MME* (hypomethylated,  
183 **Figure 3C**).

184

185 Lastly, we performed a dedicated methylation analysis of the *MLH1* promoter using a methyl NGS panel.  
186 Locations of CpG regions were shown from the transcription start site of the *MLH1* gene. Overall,  
187 thirteen CpG regions were significantly methylated in rhesus sporadic MSI-H tumor samples ( $P$ -  
188 value<0.05) compared to adjacent normal mucosa. The majority of methylated CpG regions were located  
189 within exon 1. There were no significant methylation differences between other tumor sub-groups and  
190 normal tissue samples (**Figure S4**); however, there was a clear trend of higher levels of *MLH1* promoter  
191 methylation among rhesus sporadic MSI-H compared to MSS tumors as well as a notorious absence of  
192 *MLH1* methylation in the only LS tumor tested, which is consistent with human CRC biology.

193

194 **Gene expression patterns displayed differences between rhesus colorectal tumor and adjacent**  
195 **normal mucosa.** Then, we performed whole transcriptome sequencing in 21 colorectal tumors and  
196 twenty matched normal mucosa samples. We had to exclude two tumors and four normal samples from  
197 downstream analysis due to low mapping efficiency. Unsupervised principal component analysis (PCA)  
198 of RNAseq data showed a clear separation of tumor and normal samples. However, samples from rhesus  
199 LS, rhesus sporadic MSI-H, and rhesus MSS/MSI-L clustered together without clear separation (**Figure**  
200 **4A**). Additionally, to further characterize the rhesus LS animal model for studying human MSI-H  
201 colorectal cancer, we compared the similarity between rhesus LS tumor samples and human MSI-H and  
202 MSS colorectal tumors samples. The differential gene expression between The Cancer Genome Atlas

Lermi (2021)

203 (TCGA) colorectal adenocarcinoma (COAD and READ, respectively) MSI-H tumor samples (n=96) vs.  
204 the COADREAD MSS tumor samples group (n=440) was analyzed by edgeR package. One hundred and  
205 one orthologous genes demonstrated statistically significant (BH-adjusted  $P$ -value  $< 0.05$ ) changes in the  
206 expression level by at least two-fold ( $\log_2FC \geq 1$ ). Then we compared the spearman correlation between  
207 the rhesus Lynch tumor samples (n=21) and COADREAD MSI-H and MSS samples, while we used  
208 COADREAD normal (n=54) and rhesus normal samples (n=20) as control of species distance. The rhesus  
209 Lynch tumor samples have a larger correlation with COADREAD MSI-H tumor samples (0.82) than that  
210 with COADREAD MSS samples (0.68) and normal samples (0.64, **Figure 4B**). This suggests that our  
211 analysis has sufficient resolution to compare different tumor tissue similarities.

212  
213 We then determined significantly differentially expressed genes (DEGs) between rhesus normal and  
214 tumor by setting a Benjamini-Hochberg (BH)-adjusted  $P$ -value  $\leq 0.05$  and  $\log_2$  fold change  $\pm 1$ . We  
215 annotated genes using human orthologs (**Figure S5A**). Unsupervised hierarchical clustering using DEGs  
216 demonstrated that rhesus tumor tissue samples clustered separately from normal tissue samples, and  
217 rhesus MSS/MSI-L CRC were separated from MSI-H CRC samples. Notably, animal RM17 displayed a  
218 MSS phenotype despite carrying the *MLH1* germline mutation and clustered with the MSI-H group as  
219 opposed to the LS cohort (**Figure 4D**). Using the total RNAseq data, we sought to validate the expression  
220 of MMR genes using the counts of reads in tumors and matched normal samples. *MLH1* read counts in  
221 MSI-High CRC samples were significantly decreased compared to normal tissue samples ( $P$ -  
222 value  $< 0.0001$ ). As expected, animal RM02 with a MSS tumor showed more *MLH1* read counts in tumor  
223 than matched normal (**Figure S5B**). *MSH6* gene read counts in MSI-H CRC samples were significantly  
224 more abundant than matched-normal samples ( $P$ -value  $< 0.001$ ). Differences of *MSH2* and *PMS2* gene  
225 read counts between rhesus tumor and normal tissue samples were not significant.

226

Lermi (2021)

227 We performed gene set enrichment analysis (GSEA) to discover relevant pathways in colorectal  
228 carcinogenesis of MSI-H and MSI-L/MSS rhesus CRC using the ESTIMATE algorithm, which assesses  
229 immune and stromal cell admixtures in tumors, canonical, immune, and metabolic pathways (**Figure 5A-**  
230 **C**) (14, 15). When compared with normal tissue samples, the top observed pathways enriched in MSI-H  
231 tumor samples involved in cell cycle regulation, crypt base dynamics, and integrin signaling. Conversely,  
232 metabolic pathways in MSI-H samples were downregulated compared to normal tissue (**Figure 5A**). A  
233 similar trend was observed for MSS/MSI-L tumor samples compared to normal (**Figure 5B**). Lastly,  
234 comparing the significant pathways between MSS/MSI-L and MSI-H, we observed an upregulation of  
235 key pathways involved in cell cycle regulation and MYC targeting in the MSI-H group (**Figure 5C**).

236

237 **CMS classification categorized rhesus CRC samples mainly as CMS2.** We assigned a consensus  
238 molecular subtype (CMS) status to each tumor sample based on the nearest CMS probability (**Table S3**).  
239 Overall, 52% (n=10) of tumors were classified as CMS2, which corresponds to the canonical pathways of  
240 colorectal carcinogenesis; 21% (n=4) were CMS1, which progresses through MSI and immune pathways;  
241 and 21% (n=4) were CMS4, which develops through mesenchymal pathways. Only one tumor displayed  
242 mixed features (CMS1-CMS2) of a transition phenotype (**Figures 5D**).

243

244 **Rhesus CRC causes mutations in commonly mutated CRC genes.** We examined somatic variants of  
245 rhesus CRC using total RNAseq data. Our data indicated that the mutation rate of rhesus CRC is  
246 relatively high in all tested samples (**Figure S6A**). Commonly altered genes in human CRC were also  
247 mutated in rhesus such as *APC*, *ARID1A*, *TGBRII*, *TP53*, *CTNNB1*, *PIK3CA*, *KRAS* (**Figure S6B**).

248 Substitutions of cytosine to thymine were the most abundant in somatic variants of rhesus CRC (**Figure**  
249 **S6C**). Due to the close relation found in humans between MSI-H status and *BRAF* mutations, we  
250 performed Sanger sequencing to assess the mutational status of the *BRAF* mutation hotspot *V600E* in  
251 rhesus CRC. While we did not detect *BRAF V600E* mutations among rhesus tumors, we did observe

Lermi (2021)

252 different types of *BRAF* somatic variants including missense, nonsense, in-frame, and frameshift deletions

253 **(Figure S7).**

254

Lermi (2021)

255 **Discussion**

256 Although cell cultures, organoids, and murine animal models are the most frequently used models in CRC  
257 research, these systems fail to recapitulate the phenotypic features of MMRd CRC, which limits clinical  
258 translation to humans. To overcome the differences between humans and research models, investigators  
259 have turned to NHPs due to their high degree of genomic and physiologic similarity to humans, including  
260 natural inter-individual genetic variation. Previous reports have proven rhesus macaques to serve as a  
261 durable and clinically-relevant animal model to study many infectious diseases and cancers (9, 10, 16,  
262 17). In this study, our results from MSI testing, IHC, gene expression patterns, systems biology, somatic  
263 variant calling, and DNA methylation of colon tissue samples from the KCCMR cohort demonstrated that  
264 rhesus macaques develop CRC phenotypes analogous to MSI CRCs, including LS patients. These finding  
265 indicate that rhesus macaques may serve as an optimal animal model for studying MMRd CRC and  
266 addressing the shortcomings of previously-established model systems.

267

268 To characterize the rhesus macaque as a surrogate for studies of MMRd, we investigated the MSI status  
269 of 6 markers across 41 unique rhesus tumors using a newly designed, in-house MSI panel for rhesus  
270 CRC. Our study results indicated that 76% of rhesus CRC from the KCCMR cohort had a MSI-H  
271 phenotype, which warrants the use of rhesus as an optimal system to study MSI-H carcinogenesis. Many  
272 rhesus tumors lost expression of MLH1 and PMS2 proteins, but retained the expression of MSH2 and  
273 MSH6, as confirmed by IHC analysis. The *MLH1* germline stop codon mutation (c.1029C>G,  
274 p.Tyr343Ter), previously reported as a likely pathogenic variant in human LS (National Center for  
275 Biotechnology Information), was present in 8 (19.5%) rhesus macaques, while the majority (80.5%) were  
276 wild-type for this variant.

277

278 The DNA methylation analysis of rhesus CRC in this study suggests that epigenetics plays a pivotal role  
279 in rhesus CRC development. DNA methylation status of rhesus CRC using FFPE tissue samples from  
280 colon tumor and adjacent normal tissue samples indicated clear segregation of methylation patterns

Lermi (2021)

281 between tumor/normal matches. Furthermore, based on analysis of the RRBS data, DNA methylation  
282 appears to play a major role as a driver of rhesus MSI CRC. Interestingly, although human CRC typically  
283 displays DNA methylation in the promoter region of the *MLH1* gene, methylation of rhesus CRC  
284 predominantly occurred in the exon1 region of *MLH1*.

285

286 Despite prior reports of tissue-specific transcriptome analysis of fresh frozen tissues from rhesus  
287 macaques, to date, no study has analyzed the transcriptomic profile of colonic tissue from Indian origin  
288 rhesus macaques (18). Therefore, our study is the first transcriptomic analysis of matched tumor and  
289 normal colon samples in rhesus macaques, which provides essential information for the field of MMRd-  
290 related research. Our transcriptomic data of rhesus CRC from FFPE tumor tissue displayed gene  
291 expression differences between rhesus tumor and normal tissue samples, and when compared to human  
292 TCGA MSI/MSS CRC data, rhesus MSI-H tumors were more similar to human MSI-H expression  
293 patterns than were human MSS tumors. These findings of transcriptomic homology between humans and  
294 rhesus support utilizing rhesus LS to study the carcinogenesis of MMRd CRC.

295

296 To confirm the biological relevance of the rhesus macaque as an animal model, we performed CMS  
297 classification and GSEA to ascertain the molecular features of rhesus MSI CRCs, including LS CRCs.  
298 Rhesus CRC from predominantly sporadic MSI-H and sporadic MSS/MSI-L mainly associated with  
299 CMS2—the canonical subtype—which corresponds to SCNA high and WNT/MYC activation (14).  
300 However, rhesus LS tumors primarily associated with CMS1 (MSI-Immune), which aligns with previous  
301 studies from our group and encompasses MSI, CpG Island Methylator Phenotype (CIMP) high,  
302 hypermutation, immune infiltration, and worse overall survival after relapse (19). Conversely, most  
303 human sporadic adenomatous polyps typically cluster with CMS2, which was also observed for sporadic  
304 rhesus tumor samples. This observation is not entirely consistent with results for human CRC, but could  
305 reflect that the CMS classifier has been optimized to characterize human tumors and would require some  
306 degree of optimization in rhesus samples.

Lermi (2021)

307

308 GSEA indicated activation of key pathways—namely cancer stem cell (CSC) signatures and crypt base—  
309 in sporadic MSI rhesus CRC, which corroborates a previously described signature of human MMRd CRC  
310 (20). The pathway enrichment between MSI-L/MSS and MSI-H indicates that these advanced, late-stage  
311 lesions are transcriptomically similar, which may be driven by the late time point rather than MSI status.  
312 These findings provide strong evidence to support the use of these rhesus macaques as a superior animal  
313 model for understanding the molecular basis and TME of MSI CRC tumorigenesis.

314

315 To quantify the mutational rate in rhesus MMRd CRCs, we leveraged RNAseq data of rhesus LS tissues.  
316 We acknowledge that this is not the most optimal way to analyze mutations but allowed us to observe  
317 high mutation rates in genes commonly mutated in CRC, independent of MSI status, thus adding  
318 additional support to the case for utilization of rhesus macaques for vaccine research, immunotherapy  
319 development, and biomarker studies for early detection screening.

320

321 We acknowledge that this study has several limitations necessitating further investigation. Importantly,  
322 the comparator group, MMR proficient (MMRp) tumors, only included one rhesus, which challenged the  
323 validity of the comparison between MMR proficiency and deficiency. Thus, a stronger comparator group  
324 is necessary to strengthen our findings. Furthermore, this study lacks pertinent information regarding the  
325 timeline of carcinogenesis for both sporadic and LS rhesus tumors, which restricts our understanding of  
326 pre-cancer biology, and the timing of tumor development and evolution. Additionally, neoantigen  
327 detection and T-cell receptor (TCR) profiling would be an important asset for a complete understanding  
328 of the immune system in rhesus macaque CRC. Lastly, our mutation calling was performed using total  
329 RNA sequencing data, which although adequate, is less ideal than whole exome sequencing.

330

331 In conclusion, this study provides a robust molecular and genetic characterization of a spontaneous and  
332 translationally relevant NHP animal model useful for understanding MMRd CRC, including LS CRC.

Lermi (2021)

333 These results justify the preclinical use of rhesus to study LS CRC and the larger group of sporadic MSI  
334 CRCs. Unlike well-established murine animal models and *ex-vivo* cultures, the rhesus MMRd model  
335 presented in this study, which occurs in an outbred species with inter-individual variation more  
336 representative of the human condition than laboratory mice, affords the ability to test CRC prevention  
337 strategies, assess TME dynamics, develop treatment modalities, and survey the immune landscape.



Lermi (2021)

338 **Material and Methods**

339 **Animal care.** The rhesus macaque colony detailed in this manuscript was housed and maintained at  
340 MDACC KCCMR in Bastrop, TX. The breeding colony of Indian-origin rhesus macaques (*Macaca*  
341 *mulatta*) at KCCMR is a closed breeding colony, which is specific pathogen free (SPF) for Macacine  
342 herpesvirus-1 (Herpes B), Simian retroviruses (SRV-1, SRV-2, SIV, and STLV-1), and *Mycobacterium*  
343 *tuberculosis* complex. All animal experiments were approved by the institutional animal care and use  
344 committee (IACUC) and the care of the animals was in accordance with institutional guidelines (IACUC  
345 protocol #0804-RN02). Animal care and husbandry conformed to practices established by the Association  
346 for the Assessment and Accreditation of Laboratory Animal Care (AAALAC), The Guide for the Care  
347 and Use of Laboratory Animals, and the Animal Welfare Act. Tissue specimens from the proximal colon  
348 (n=20), the ileocecal junction (n=16), cecocolic junction (n=2), cecum (n=2), and jejunum (n=1), as well  
349 as blood samples of rhesus macaques, were collected opportunistically at necropsy following euthanasia  
350 for clinical reasons. Formalin-fixed paraffin-embedded (FFPE) blocks and hematoxylin and eosin (H&E)  
351 slides were prepared by veterinary pathology technicians and the diagnosis confirmed by veterinary  
352 (C.L.H.) and human pathologists (M.W.T).

353  
354 **Nucleic acid extraction.** Macro-dissection was performed to decrease the admixture of adjacent normal  
355 tissue and to enrich the percentage of tumor material for subsequent DNA and RNA extraction. De-  
356 paraffinization of FFPE tumor and adjacent normal specimens was performed using QIAGEN de-  
357 paraffinization solution (QIAGEN, Valencia, CA). DNA and RNA from 19 tumor and adjacent normal  
358 samples was extracted using the AllPrep DNA/RNA FFPE Kit (QIAGEN) following the manufacturer's  
359 protocol. In the case of the unavailability of FFPE samples, genomic DNA and RNA were extracted from  
360 fresh frozen tumor (n=2) and normal (n=3) samples using the ZR-Duet DNA/RNA MiniPrep extraction  
361 kit (ZYMO RESEARCH, Irvine, CA). Quantification was performed with a NanoDrop One™  
362 spectrophotometer (Thermo Fisher Scientific, Waltham, MA) and Qubit™ Fluorometer 2.0 (Qubit, San

Lermi (2021)

363 Francisco, CA) using dsDNA and RNA assay kits. RNA integrity was analyzed using the Tape Station  
364 RNA assay kit (Agilent Technologies, Santa Clara, CA).

365

366 ***Panel design for MSI testing.*** Commonly used human MSI markers (BAT25, BAT26, BAT40, D10S197,  
367 D18S58, D2S123, D17S250, D5S346,  $\beta$ -catenin, and TGF $\beta$ RII) were used as a reference to design a  
368 panel of rhesus MSI markers (21, 22). In brief, genomic positions of human MSI markers in the rhesus  
369 macaque genome (rheMac8) were identified using the batch coordinate conversion tool (liftOver) in the  
370 UCSC genome browser (23). Repeat patterns were compared to human MSI markers (**Table S1**).  
371 Orthologous microsatellite regions corresponding to human MSI markers D2S123, D17S250, and  
372 D5S346 were not specific to assess MSI in the rhesus genome. Therefore, they were excluded from the  
373 final MSI rhesus panel. Primer sequences to target identified microsatellite regions in rhesus were  
374 designed using the NCBI Primer Blast tool (Accession ID# GCF\_000772875.2) (24). The primer  
375 efficiency was evaluated using the UCSC Genome Browser In-Silico PCR tool (23) with rheMac8 as a  
376 reference control. The Baylor College of Medicine genome database was used to calculate the probability  
377 of encountering SNPs within the primer sequences. Primers sequences with allele frequency greater than  
378 0.05% were redesigned (**Table S2**).

379

380 ***PCR-based MSI testing in rhesus CRC.*** Multiplex PCRs were designed with at least 25 bp size  
381 differences among PCR amplicons to afford clear distinction and identification on electropherograms  
382 from the Agilent Bioanalyzer 2100. All markers were amplified in 25  $\mu$ l PCR reactions using 12.5  $\mu$ l of  
383 AmpliTaq Gold™ 360 PCR master mix (Thermo Fisher Scientific, Waltham, MA), corresponding primer  
384 sets, and 10 ng of FFPE DNA. Multiplex PCRs were performed in a Veriti 96 Well Thermal Cycler  
385 (Applied Biosystems®, Foster City, CA) under the following cycling conditions: initial denaturation at  
386 95°C for 10 min, followed by 35 cycles at 95°C for 30 sec, 55°C for 30 sec, and 72°C for 30 sec. A final  
387 extension at 70°C for 30 min was implemented to aid non-template adenine addition. Multiplex PCR  
388 products were resolved on a 5% ethidium-bromide stained agarose gel. Multiplex PCRs were analyzed

Lermi (2021)

389 via Agilent 2100 Bioanalyzer DNA 1000 kit (Agilent Technologies, Santa Clara, CA). Electropherograms  
390 of adjacent normal and tumor tissue samples were compared to assess the status for each of the MSI  
391 markers. Per NCI recommendations, MSI status was assigned by counting the number of unstable MSI  
392 markers and samples were assigned to either: MSS (stable markers), MSI-L (1 unstable marker,  $\leq 30\%$ ),  
393 or MSI-H (2 or more unstable markers,  $\geq 30\%$ ) (13).

394

395 ***MSI testing via fragment analysis for validation of the RheBAT26 and RheD18S58 markers.*** Fragment  
396 analysis (Applied Biosystems®, Foster City, CA) was performed to validate MSI results from the Agilent  
397 2100 Bioanalyzer for RheBAT26 and RheD18S58 MSI markers. In brief, the 5' end of the forward primer  
398 sequences for RheBAT26 and RheD18S58 MSI markers was labeled with a 6-FAM fluorescent dye  
399 (Thermo Fisher Scientific, Waltham, MA). A multiplex PCR was designed to amplify RheBAT26 and  
400 RheD18S58 MSI markers with labeled primer sequences. PCR master mix and conditions were adopted  
401 from well-established PCR experiments. The fragment analysis method was performed by the Advanced  
402 Technology Genomics Core at MDACC.

403

404 ***Sanger sequencing for discovery of germline MLH1 and somatic BRAF mutations.*** Primer sequences  
405 were designed to target *de novo* stop codon *MLH1* and *BRAF* mutations following previously described  
406 procedures (see panel design section, **Table S2**). PCRs were performed using the Veriti 96 Well Thermal  
407 Cycler (Applied Biosystems®, Foster City, CA) under the following cycling conditions: initial  
408 denaturation at 95°C for 10 min, followed by 35 cycles at 95°C for 30 sec, 55°C for 30 sec and 72°C for  
409 30 sec, with a final extension at 72°C for 7 min. Purification of PCR products was performed with an in-  
410 house ExoSAP solution [50 µl of Exonuclease I (20,000 units/ml) (NEB® M0568, Ipswich, MA); 40 µl  
411 of Antarctic Phosphatase (5,000 units/ml); 16 µl of Antarctic Phosphatase buffer (NEB® M0289S,  
412 Ipswich, MA); 144 µl of nuclease-free H<sub>2</sub>O]. PCR conditions for purification of PCR products were  
413 incubation at 37°C for 15 min and at 80°C for 15 min. Quality control of PCR products and purified PCR  
414 products was performed running 1% Agarose gel prepared with 25 ml of 1X TBE buffer and 1.2 µl of

Lermi (2021)

415 EtBr. Then, gel-purified PCR products were sequenced by the MDACC sequencing core (ATGC) via the  
416 Sanger Sequencing method. Analysis of Sanger sequencing data was performed using DNASTAR  
417 lasergene software.

418

419 **Immunohistochemistry (IHC).** Immunohistochemistry (IHC) staining for MLH1, MSH2, MSH6, and  
420 PMS2 was performed in FFPE tissue sections. Tissue sections were cut at 4  $\mu$ m and submitted to the  
421 MDACC Research Histology, Pathology, and Imaging Core (RHPI) in Smithville, TX. The following  
422 Agilent Dako IHC antibodies were used according to manufacturer's recommendations: IR079,  
423 Monoclonal Mouse Anti-human Mutl Protein Homolog 1, clone ES05 for MLH1; IR085, Monoclonal  
424 Mouse Anti-human Muts Protein Homolog 2, clone FE11 for MSH2; IR086 Monoclonal Rabbit Anti-  
425 human Muts Protein Homolog 6, clone EP49 for MSH6; IR087, Monoclonal Rabbit Anti-Human  
426 Postmitotic Segregation Increase 2, clone EPS1 for PMS2 (10).

427

428 **Total RNA Sequencing.** Truseq stranded total RNA library preparation kit (Illumina®, San Diego, CA)  
429 was used to prepare libraries of 21 tumors and 20 matched normal RNA samples, which were extracted  
430 from FFPE and frozen tissue samples. Prepared libraries were sequenced for 76nt paired-end sequencing  
431 on HiSeq™ 4000 and NovaSeq6000™ sequencers (Illumina®, San Diego, CA).

432

433 **Assessment of DNA methylation testing of MLH1.** DNA methylation analysis of the *MLH1* gene was  
434 performed on DNA from frozen tissue samples of 7 tumors and 3 normal tissue (duodenum and blood)  
435 samples using a targeted NGS assay (EpigenDx, Hopkinton, MA). In brief, the bisulfite-treated DNA  
436 samples were used as a template for PCR to amplify a short amplicon of 300-500 bp using a set of  
437 primers that cover the *MLH1* genomic sequence at -4 kb to + 1kb from the transcriptional start site (TSS).  
438 Later, methylation libraries were constructed for methylation analysis on the Ion Torrent instrument at  
439 EpigenDx.

440

Lermi (2021)

441 ***DNA methylation assessment via reduced representation bisulfite sequencing (RRBS)***. DNA libraries of  
442 RRBS were constructed from FFPE tissue samples of 14 tumors/adjacent normal tissue pairs using the  
443 Ovation RRBS Methyl-Seq System at The Epigenomics Profiling Core (EpiCore) of MDACC. In  
444 preparation, DNA was digested with a restriction enzyme and selected for size based on established  
445 protocols used in the EpiCore. Post-adaptor ligation ensured enrichment for CpG islands, and DNA was  
446 bisulfite-treated, amplified with universal primers, and qualified libraries were then sequenced on  
447 Novaseq6000™ and MiSeq sequencers at the UTMDACC ATGC.

448

449 ***Bioinformatics Analysis***. The FASTQC toolkit was performed for quality control of FASTQ files  
450 generated from RNA sequencing (25). The fastp tool was performed to trim adapters and low-quality  
451 reads (26). Fasta and gtf files of the reference genome (Mmul\_8.0.1) were downloaded from the Ensembl  
452 genome browser (27). The reference genome was indexed using the STAR RNA sequencing aligner.  
453 Cleaned reads of total RNA sequencing were aligned to the reference genome using the STAR RNA  
454 sequencing aligner. Gene level estimated read counts were calculated by STAR RNA sequencing aligner  
455 and were saved in reads per gene tabular files (28). This pipeline was implemented on the high-  
456 performance computing (HPC) cluster of MDACC. As performed for total RNA sequencing, RRBS  
457 FASTQ files were quality controlled using the FASTQC toolkit (25). TrimGalore was performed to trim  
458 adapters and low-quality reads. Diversity trimming and filtering were completed with NuGEN's diversity  
459 trimming scripts. Processed fastq files were aligned to the reference genome (Mmul\_10) with bismark  
460 bisulfite mapper. The methylation information was extracted with bismark methylation extractor script.

461

462 Gene expression analysis of RNA sequencing samples with less than 50% uniquely mapped alignment  
463 scores were excluded from downstream analyses. Count data per each sample generated by STAR RNA  
464 sequencing aligner was combined into one matrix for downstream bioinformatics analyses. Genes that  
465 have more than a sum of 100 reads in all samples were excluded from the analysis. The estimated read  
466 counts of samples were normalized with variance stabilizing transformation (VST) using the DESeq2

Lermi (2021)

467 Bioconductor R package (21, 29-31). MSI-L and MSS CRC cases were combined together based on  
468 previous human studies. Significant differentially expressed genes between MSI-H and MSS/MSI-L  
469 rhesus CRC were calculated using Benjamini-Hochberg (BH)-adjusted P-value  $\leq 0.05$  and log<sub>2</sub> fold  
470 change  $\geq -1$  and log<sub>2</sub> fold change  $\leq 1$ . Unsupervised hierarchical clustering was performed via Pearson's  
471 correlation. Comparisons of MMR gene counts between tumor and adjacent normal colorectal mucosa  
472 were performed using the DESeq2 Bioconductor R package. Complex heatmap and an enhanced volcano  
473 plot were created in R studio (version 3.6.1) (32). Rhesus Ensembl gene-IDs were converted to human  
474 Entrez ID for the CMS classification and GSEA. CMS classification of tumor samples was predicted  
475 using the random forest (RF) predictor in CMSclassifier R package (version 3.6.1) (14, 19). CMS  
476 classification was assigned to the subtype with the highest posterior probability. GSEA was performed  
477 with 1,000 permutations using CRC pathways with the fgsea R package (14, 33). CRC pathways included  
478 signatures of interest in CRC, the ESTIMATE algorithm that assesses immune and stromal cell admixture  
479 in tumor samples, canonical pathways, immune signatures, and metabolic pathways (33, 34).

480

481 Somatic and germline variant analyses of rhesus CRC samples were performed following GATK best  
482 practices. Filtered variants by Mutect2 and Haplotypecaller tools of GATK were annotated with Variant  
483 Effect Predictor (VEP) (35). Mutation rates were calculated by dividing the number of non-synonymous  
484 somatic mutations by the number of callable bases.

485

486 Species comparison using TCGA datasets utilized raw RNA-Seq counts of MSI-H and MSS colorectal  
487 tumor samples and corresponding normal tissue samples (the 2016-01-28 analyses) of the TCGA project  
488 COADREAD and MSI status information was downloaded via FirebrowseR (version 1.1.35) package  
489 (36, 37). Then the raw data was filtered (min.count = 10, min.total.count = 15, large.n = 10, min.prop =  
490 0.7) and normalized (TMM method) by package edgeR (version 3.32.1) (38). Genes showing statistically  
491 significant (BH-adjusted p-value < 0.05) changes in the expression level by at least two-fold (log<sub>2</sub>FC = 1)  
492 between MSI-H and MSS samples were identified for the following analysis. The rhesus homologs were

Lermi (2021)

493 found by the Ensembl genome database via the biomaRt package (version 2.46.3) (39-41). Mean CPM  
494 (counts per million) of each in COADREAD MSI-H tumor tissues, COADREAD MSS tumor tissues,  
495 COADREAD normal tissues, rhesus LS tumor tissues, and rhesus LS normal tissues were used to  
496 calculate the Pearson's correlation of each group. CPM of each gene was used to perform the  
497 unsupervised hierarchical clustering, and to generate the dendrogram tree and heat map for individual  
498 samples.

499 For DNA methylation analysis of RRBS, PCA and sample clustering were performed using cytosine  
500 report files in methylKit Bioconductor R package (35). The minimum coverage depth was 10 reads.  
501 Differentially methylated regions (DMR) were calculated using bismark coverage report files with edgeR  
502 Bioconductor R package (26). Significant DMRs at CpG loci were displayed at an FDR of 5%.

503

#### 504 **Author's contributions**

505 EV, SBG, JR, KMS conceived and supervised the study, and provided critical resources to perform the  
506 experiments, and wrote the manuscript; NOL designed, performed the experiments, analyzed data, and  
507 wrote the manuscript; NOL, RAH, MR and ND performed the analysis of RNA-sequencing data and  
508 other bioinformatics analysis; CLH and MWT interpreted pathology slides; SBG and BKD provided the  
509 animal model and specimens for analysis; FB genotyped the animals; CMB, LR-U, and KCM provided  
510 assistance on the analysis and interpretation of the data, and writing and editorial assistance. All authors  
511 critically read and intellectually contributed to the manuscript.

512

#### 513 **Acknowledgements**

514 We acknowledge the support of Dr. Awdhesh Kalia at the School of Health Professions of MDACC for  
515 providing access to the Agilent 2100 Bioanalyzer for MSI testing analysis. We acknowledge the support  
516 of the Advanced Technology Genomics Core (ATGC) for performing the RNAseq, Sanger sequencing,

Lermi (2021)

- 517 fragment analysis, and RRBS of this project; and Dr. Marcos R. Estecio for RRBS library preparation;
- 518 and support of the High-Performance Computing facility, which provided computational resources.



Lermi (2021)

519 **References**

- 520 1. Siegel RL, Miller KD, Goding Sauer A, Fedewa SA, Butterly LF, Anderson JC, et al. Colorectal  
521 cancer statistics, 2020. *CA Cancer J Clin.* 2020;70(3):145-64.
- 522 2. Granat LM, Kambhampati O, Klosek S, Niedzwecki B, Parsa K, and Zhang D. The promises and  
523 challenges of patient-derived tumor organoids in drug development and precision oncology.  
524 *Animal Model Exp Med.* 2019;2(3):150-61.
- 525 3. McIntyre RE, Buczacki SJ, Arends MJ, and Adams DJ. Mouse models of colorectal cancer as  
526 preclinical models. *Bioessays.* 2015;37(8):909-20.
- 527 4. Phillips KA, Bales KL, Capitanio JP, Conley A, Czoty PW, Hart BA, et al. Why primate models  
528 matter. *Am J Primatol.* 2014;76(9):801-27.
- 529 5. Brammer DW, Gillespie PJ, Tian M, Young D, Raveendran M, Williams LE, et al. MLH1-  
530 rheMac hereditary nonpolyposis colorectal cancer syndrome in rhesus macaques. *Proc Natl Acad*  
531 *Sci U S A.* 2018;115(11):2806-11.
- 532 6. Bakken TE, Miller JA, Ding SL, Sunkin SM, Smith KA, Ng L, et al. A comprehensive  
533 transcriptional map of primate brain development. *Nature.* 2016;535(7612):367-75.
- 534 7. Rogers J, and Gibbs RA. Comparative primate genomics: emerging patterns of genome content  
535 and dynamics. *Nat Rev Genet.* 2014;15(5):347-59.
- 536 8. Friedman H, Haigwood N, Ator N, Newsome W, Allan JS, Golos TG, et al. The Critical Role of  
537 Nonhuman Primates in Medical Research - White Paper. *Pathogens and Immunity.*  
538 2017;2(3):352-65.
- 539 9. Brewer M, Baze W, Hill L, Utzinger U, Wharton JT, Follen M, et al. Rhesus macaque model for  
540 ovarian cancer chemoprevention. *Comp Med.* 2001;51(5):424-9.
- 541 10. Dray BK, Raveendran M, Harris RA, Benavides F, Gray SB, Perez CJ, et al. Mismatch repair  
542 gene mutations lead to lynch syndrome colorectal cancer in rhesus macaques. *Genes Cancer.*  
543 2018;9(3-4):142-52.

Lermi (2021)

- 544 11. Harding JD. Genomic Tools for the Use of Nonhuman Primates in Translational Research. *Ilar j.*  
545 2017;58(1):59-68.
- 546 12. National Center for Biotechnology Information A.  
547 <https://www.ncbi.nlm.nih.gov/clinvar/variation/VCV000560781.1>
- 548 13. Berg KD, Glaser CL, Thompson RE, Hamilton SR, Griffin CA, and Eshleman JR. Detection of  
549 microsatellite instability by fluorescence multiplex polymerase chain reaction. *J Mol Diagn.*  
550 2000;2(1):20-8.
- 551 14. Guinney J, Dienstmann R, Wang X, de Reynies A, Schlicker A, Sonesson C, et al. The consensus  
552 molecular subtypes of colorectal cancer. *Nat Med.* 2015;21(11):1350-6.
- 553 15. Yoshihara K, Shahmoradgoli M, Martínez E, Vegesna R, Kim H, Torres-Garcia W, et al.  
554 Inferring tumour purity and stromal and immune cell admixture from expression data. *Nat*  
555 *Commun.* 2013;4:2612.
- 556 16. Uno H, Alsum P, Zimbric ML, Houser WD, Thomson JA, and Kemnitz JW. Colon cancer in aged  
557 captive rhesus monkeys (*Macaca mulatta*). *Am J Primatol.* 1998;44(1):19-27.
- 558 17. Simmons HA. Age-Associated Pathology in Rhesus Macaques (*Macaca mulatta*). *Vet Pathol.*  
559 2016;53(2):399-416.
- 560 18. Peng X, Thierry-Mieg J, Thierry-Mieg D, Nishida A, Pipes L, Bozinoski M, et al. Tissue-specific  
561 transcriptome sequencing analysis expands the non-human primate reference transcriptome  
562 resource (NHPRTTR). *Nucleic Acids Res.* 2015;43(Database issue):D737-42.
- 563 19. Chang K, Willis JA, Reumers J, Taggart MW, San Lucas FA, Thirumurthi S, et al. Colorectal  
564 premalignancy is associated with consensus molecular subtypes 1 and 2. *Ann Oncol.*  
565 2018;29(10):2061-7.
- 566 20. Bommi PV, Bowen CM, Reyes-Uribe L, Wu W, Katayama H, Rocha P, et al. The Transcriptomic  
567 Landscape of Mismatch Repair-Deficient Intestinal Stem Cells. *Cancer Res.* 2021;81(10):2760-  
568 73.

Lermi (2021)

- 569 21. Boland CR, and Goel A. Microsatellite instability in colorectal cancer. *Gastroenterology*.  
570 2010;138(6):2073-87 e3.
- 571 22. Schieman U, Müller-Koch Y, Gross M, Daum J, Lohse P, Baretton G, et al. Extended  
572 microsatellite analysis in microsatellite stable, MSH2 and MLH1 mutation-negative HNPCC  
573 patients: genetic reclassification and correlation with clinical features. *Digestion*. 2004;69(3):166-  
574 76.
- 575 23. Hinrichs AS, Karolchik D, Baertsch R, Barber GP, Bejerano G, Clawson H, et al. The UCSC  
576 Genome Browser Database: update 2006. *Nucleic Acids Res*. 2006;34(Database issue):D590-8.
- 577 24. Ye J, Coulouris G, Zaretskaya I, Cutcutache I, Rozen S, and Madden TL. Primer-BLAST: a tool  
578 to design target-specific primers for polymerase chain reaction. *BMC Bioinformatics*.  
579 2012;13:134.
- 580 25. Andrews S. FastQC: A Quality Control Tool for High Throughput Sequence Data. 2010.
- 581 26. Chen S, Zhou Y, Chen Y, and Gu J. fastp: an ultra-fast all-in-one FASTQ preprocessor.  
582 *Bioinformatics*. 2018;34(17):i884-i90.
- 583 27. Yates AD, Achuthan P, Akanni W, Allen J, Allen J, Alvarez-Jarreta J, et al. Ensembl 2020.  
584 *Nucleic Acids Res*. 2020;48(D1):D682-d8.
- 585 28. Dobin A, Davis CA, Schlesinger F, Drenkow J, Zaleski C, Jha S, et al. STAR: ultrafast universal  
586 RNA-seq aligner. *Bioinformatics*. 2013;29(1):15-21.
- 587 29. Love MI, Huber W, and Anders S. Moderated estimation of fold change and dispersion for RNA-  
588 seq data with DESeq2. *Genome Biol*. 2014;15(12):550.
- 589 30. Baretta M, and Le DT. DNA mismatch repair in cancer. *Pharmacol Ther*. 2018;189:45-62.
- 590 31. Kawakami H, Zaanani A, and Sinicrope FA. Microsatellite instability testing and its role in the  
591 management of colorectal cancer. *Curr Treat Options Oncol*. 2015;16(7):30.
- 592 32. Gu Z, Eils R, and Schlesner M. Complex heatmaps reveal patterns and correlations in  
593 multidimensional genomic data. *Bioinformatics*. 2016;32(18):2847-9.

Lermi (2021)

- 594 33. Sergushichev AA, Loboda AA, Jha AK, Vincent EE, Driggers EM, Jones RG, et al. GAM: a  
595 web-service for integrated transcriptional and metabolic network analysis. *Nucleic Acids Res.*  
596 2016;44(W1):W194-200.
- 597 34. Yoshihara K, Shahmoradgoli M, Martinez E, Vegesna R, Kim H, Torres-Garcia W, et al.  
598 Inferring tumour purity and stromal and immune cell admixture from expression data. *Nat*  
599 *Commun.* 2013;4:2612.
- 600 35. Akalin A, Kormaksson M, Li S, Garrett-Bakelman FE, Figueroa ME, Melnick A, et al.  
601 methylKit: a comprehensive R package for the analysis of genome-wide DNA methylation  
602 profiles. *Genome Biol.* 2012;13(10):R87.
- 603 36. Robinson MD, and Oshlack A. A scaling normalization method for differential expression  
604 analysis of RNA-seq data. *Genome Biol.* 2010;11(3):R25.
- 605 37. Deng M, Bragelmann J, Kryukov I, Saraiva-Agostinho N, and Perner S. FirebrowseR: an R client  
606 to the Broad Institute's Firehose Pipeline. *Database (Oxford).* 2017;2017.
- 607 38. Robinson MD, McCarthy DJ, and Smyth GK. edgeR: a Bioconductor package for differential  
608 expression analysis of digital gene expression data. *Bioinformatics.* 2010;26(1):139-40.
- 609 39. Yates AD, Achuthan P, Akanni W, Allen J, Allen J, Alvarez-Jarreta J, et al. Ensembl 2020.  
610 *Nucleic Acids Res.* 2020;48(D1):D682-D8.
- 611 40. Durinck S, Moreau Y, Kasprzyk A, Davis S, De Moor B, Brazma A, et al. BioMart and  
612 Bioconductor: a powerful link between biological databases and microarray data analysis.  
613 *Bioinformatics.* 2005;21(16):3439-40.
- 614 41. Durinck S, Spellman PT, Birney E, and Huber W. Mapping identifiers for the integration of  
615 genomic datasets with the R/Bioconductor package biomaRt. *Nat Protoc.* 2009;4(8):1184-91.

616

Lermi (2021)

617 **Figure Legends**

618 **Figure 1. Schematic outline of the experimental design.** Sporadic and rhesus Lynch

619 (heterozygous *MLH1* nonsense mutation, c.1029, C>G) animals bred and housed at UTMDACC KCCMR

620 were used to genomically characterize colorectal tumors using an in-house MSI panel, IHC of MMR

621 proteins, epigenetic evaluation, whole transcriptomic analysis, and CMS classification. These analyses

622 establish the framework for utilizing rhesus as a surrogate to study MMRd CRC. UTMDACC KCCMR,

623 University of Texas MD Anderson Cancer Center Michale E. Keeling Center for Comparative Medicine

624 and Research; MSI, microsatellite instability; MMRd, mismatch-repair deficiency; CMS, consensus

625 molecular subtype; CRC, colorectal cancer.

626

627 **Figure 2. Clinical, pathological, and molecular characteristics of the Rhesus cohort.** (A) Animal ages

628 at the time of diagnosis of CRC and subsequent euthanasia. The average age at death for the rhesus CRC

629 cohort was 19.3 years. Red dots denote the age of animals with *MLH1* germline mutation; (B) Gender of

630 KCCMR rhesus cohort. The majority of animals in this cohort were female; (C) Lynch syndrome *MLH1*

631 germline mutation status. Out of forty-one animals, eight (20%) carried a heterozygous *MLH1* nonsense

632 mutation (c.1029, C>G); (D) IHC assessment of rhesus CRC. The majority of tumor samples of rhesus

633 CRC displayed loss of MLH1 and PMS2; (E) MSI testing of rhesus tumors. A newly designed MSI

634 testing panel for rhesus CRC included six markers (RheBAT25, RheBAT26, RheBAT40, RheD10S197,

635 RheD18S58, and RheTGF $\beta$ R2) that were orthologs of commonly tested MSI loci in human tumors

636 (BAT25, BAT26, BAT40, D10S197, D18S58, and TGFBR2). Overall, RheBAT25, RheBAT26, and

637 RheD18S58 MSI markers were the most mutable MSI markers in rhesus CRC; (F) Summary of MSI

638 status of rhesus tumors. Rhesus CRC were predominantly MSI-H (75%), and only six tumors (15%) were

639 MSI-L, and four (10%) MSS.

640

641 **Figure 3. Methylation analysis of rhesus CRC.** (A) PCA of DNA methylation in rhesus specimens

642 characterizing the trends exhibited by the differentially methylated region profiles of sporadic MSI-H

Lermi (2021)

643 (green triangle), sporadic MSS and MSI-L (purple plus), Lynch syndrome (blue square), and normal  
644 tissue (red circle) samples. Each shape represents a tissue sample type. Each group clustered separately;  
645 **(B)** Hierarchical clustering of DNA methylation profiles assessed by CpG methylation using Pearson's  
646 correlation. Distance displays the relationship between rhesus tumors and matched normal tissue samples  
647 with parameters set as distance method: "correlation", clustering method: "ward"; **(C)** Significant  
648 differentially methylated regions (DMRs) of rhesus normal and tumor samples at FDR of 5%. *TOP1*,  
649 *PCGF3* and *FAM76B* were some of the hyper-methylated genes, and *GAS8*, *ALKBH5* and *MME* were  
650 hypo-methylated genes in rhesus CRC.

651  
652 **Figure 4. Transcriptomic analysis of rhesus CRC.** **(A)** Principal component analysis (PCA) of rhesus  
653 CRC showed the trends exhibited by the expression profiles of sporadic MSI-H samples (green triangles),  
654 sporadic MSS and MSI-L (blue squares), Lynch syndrome (red circles), and normal tissue (purple plus  
655 signs). Normal tissue samples clustered separately from tumor tissue samples; **(B)** Pearson's correlation  
656 coefficient of mean expression levels across 101 significant genes from COADREAD MSI-H tumor  
657 samples, COADREAD MSS tumor samples, COADREAD normal tissue samples, rhesus LS tumor  
658 samples, and rhesus normal tissue samples; **(C)** Significant differentially expressed genes (DEGs)  
659 between tumor and normal tissue samples. DEGs were found based on BH-adjusted  $P\text{-value} \leq 0.05$   
660 between rhesus colorectal normal and tumor. Pearson's correlation was used to perform hierarchical  
661 clustering between rhesus tumor and normal tissue samples. Columns represent samples, and rows  
662 represent statistically significant differentially expressed genes. Gray color represents normal, pink MSI-  
663 H, and magenta MSS and MSI-L tissue samples.

664  
665 **Figure 5. Gene set enrichment analysis in rhesus CRC.** **(A-C)** Gene expression pathways are  
666 significantly deregulated in rhesus CRC. Pathways relevant to CRC biology are highlighted. BH-adjusted  
667  $P\text{-value} \leq 0.05$  was set as a threshold for analysis; **(D)** CMS classification of rhesus CRC. The outer ring  
668 of circos plot represents CMS subtypes present in rhesus CRC with 52% of samples (n=10) classifying as

Lermi (2021)

669 CMS2. The middle ring represents the MSI status of samples, and the inner ring indicates clinical  
670 categories of samples.

## Figure 1

bioRxiv preprint doi: <https://doi.org/10.1101/2021.08.19.456691>; this version posted August 19, 2021. The copyright holder for this preprint (which was not certified by peer review) is the author/funder, who has granted bioRxiv a license to display the preprint in perpetuity. It is made available under a [CC-BY-NC-ND 4.0 International license](#).

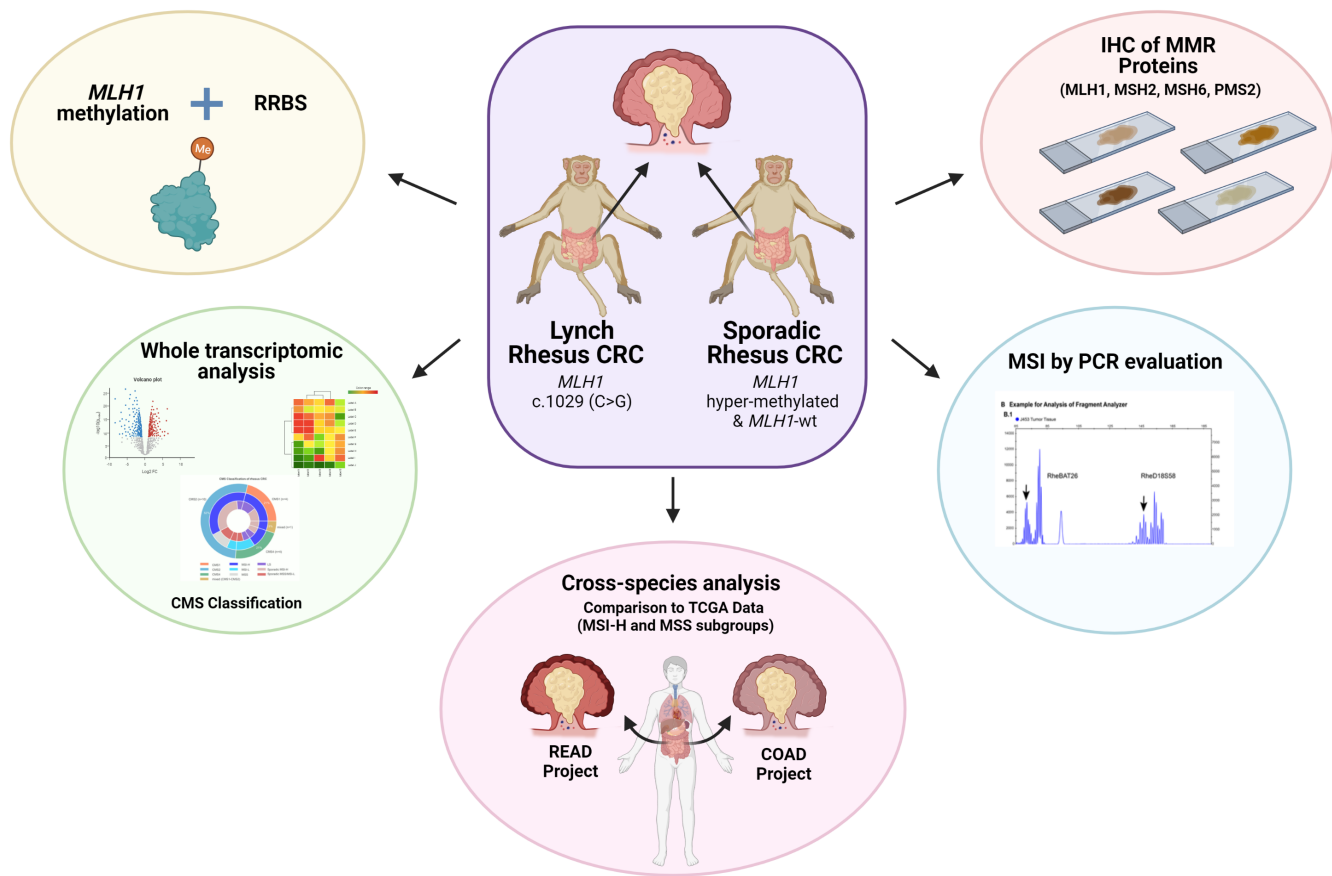

**Figure 1. Schematic outline of the experimental design.** Sporadic and rhesus Lynch (heterozygous *MLH1* nonsense mutation, c.1029, C>G) animals bred and housed at UTMDACC KCCMR were used to genomically characterize colorectal tumors using an in-house MSI panel, IHC of MMRd proteins, epigenetic evaluation, whole transcriptomic analysis, and CMS classification. These analyses establish the framework for utilizing rhesus as a surrogate to study MMRd CRC. UTMDACC KCCMR, University of Texas MD Anderson Cancer Center Michale E. Keeling Center for Comparative Medicine and Research; MSI, microsatellite instability; MMRd, mismatch-repair deficiency; CMS, consensus molecular subtype; CRC, colorectal cancer.



## Figure 2

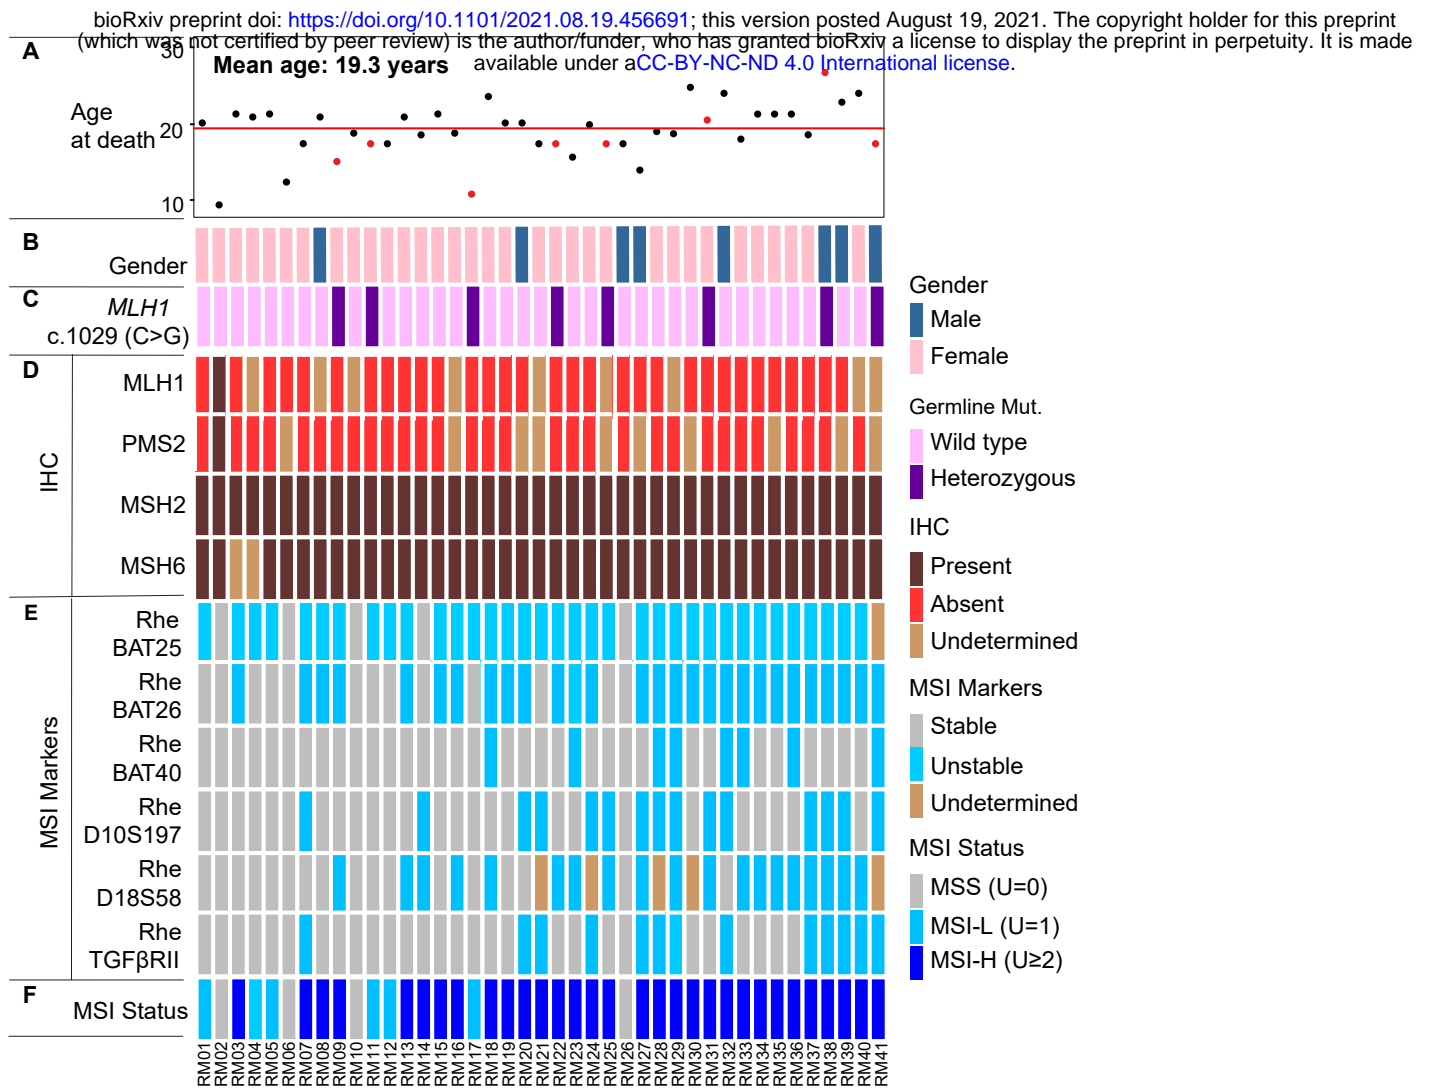

**Figure 2. Clinical, pathological, and molecular characteristics of the Rhesus cohort.** (A) Animal ages at the time of diagnosis of CRC and subsequent euthanasia. The average age at death for the rhesus CRC cohort was 19.3 years. Red dots demarcate age of animals with *MLH1* germline mutation; (B) Gender of KCCMR rhesus cohort. The majority of animals in this cohort were female; (C) Lynch syndrome *MLH1* germline mutation status. Out of forty-one animals, eight (20%) carried a heterozygous *MLH1* nonsense mutation (c.1029, C>G); (D) IHC assessment of rhesus CRC. The majority of tumor samples of rhesus CRC displayed loss of *MLH1* and *PMS2*; (E) MSI testing of rhesus tumors. Newly designed MSI testing panel for rhesus CRC included six markers (RheBAT25, RheBAT26, RheBAT40, RheD10S197, RheD18S58, and RheTGFβRII) that were orthologs of commonly tested MSI loci in human tumors (BAT25, BAT26, BAT40, D10S197, D18S58, and TGFβRII). Overall, RheBAT25, RheBAT26, and RheD18S58 MSI markers were the most mutable MSI markers in rhesus CRC; (F) Summary of MSI status of rhesus tumors. Rhesus CRC were predominantly MSI-H (75%), and only six tumors (15%) were MSI-L, and four (10%) MSS.

### Figure 3

bioRxiv preprint doi: <https://doi.org/10.1101/2021.08.19.456691>; this version posted August 19, 2021. The copyright holder for this preprint (which was not certified by peer review) is the author/funder, who has granted bioRxiv a license to display the preprint in perpetuity. It is made available under a [CC-BY-NC-ND 4.0 International license](https://creativecommons.org/licenses/by-nc-nd/4.0/).

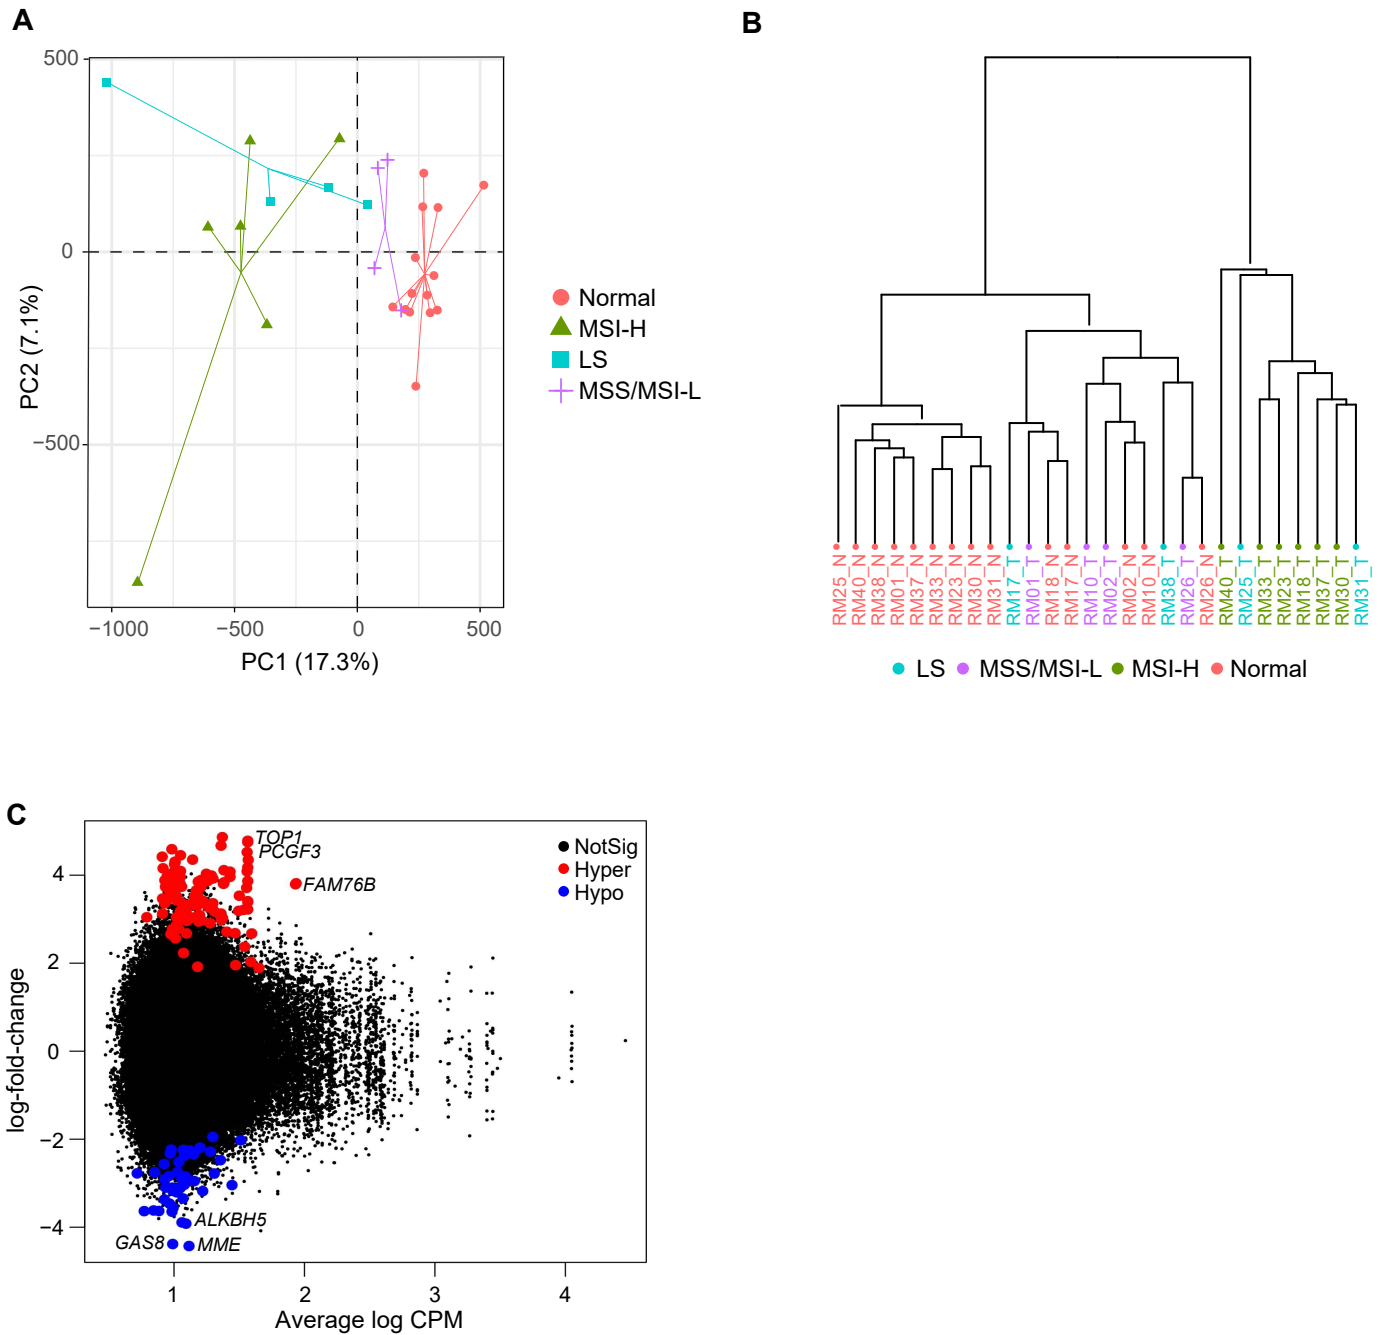

**Figure 3. Methylation analysis of rhesus CRC.** (A) PCA of DNA methylation in rhesus specimens characterizing the trends exhibited by the differentially methylated region profiles of sporadic MSI-H (green triangle), sporadic MSS and MSI-L (purple plus), Lynch syndrome (blue square), and normal tissue (red circle) samples. Each shape represents a tissue sample type. Each group clustered separately; (B) Hierarchical clustering of DNA methylation profiles assessed by CpG methylation using Pearson's correlation. Distance displays the relationship between rhesus tumors and matched normal tissue samples with parameters set as distance method: "correlation", clustering method: "ward"; (C) Significant differentially methylated regions (DMRs) of rhesus normal and tumor samples at FDR of 5%. *TOP1*, *PCGF3* and *FAM76B* were some of the hyper-methylated genes, and *GAS8*, *ALKBH5* and *MME* were hypo-methylated genes in rhesus CRC.

**Figure 4**

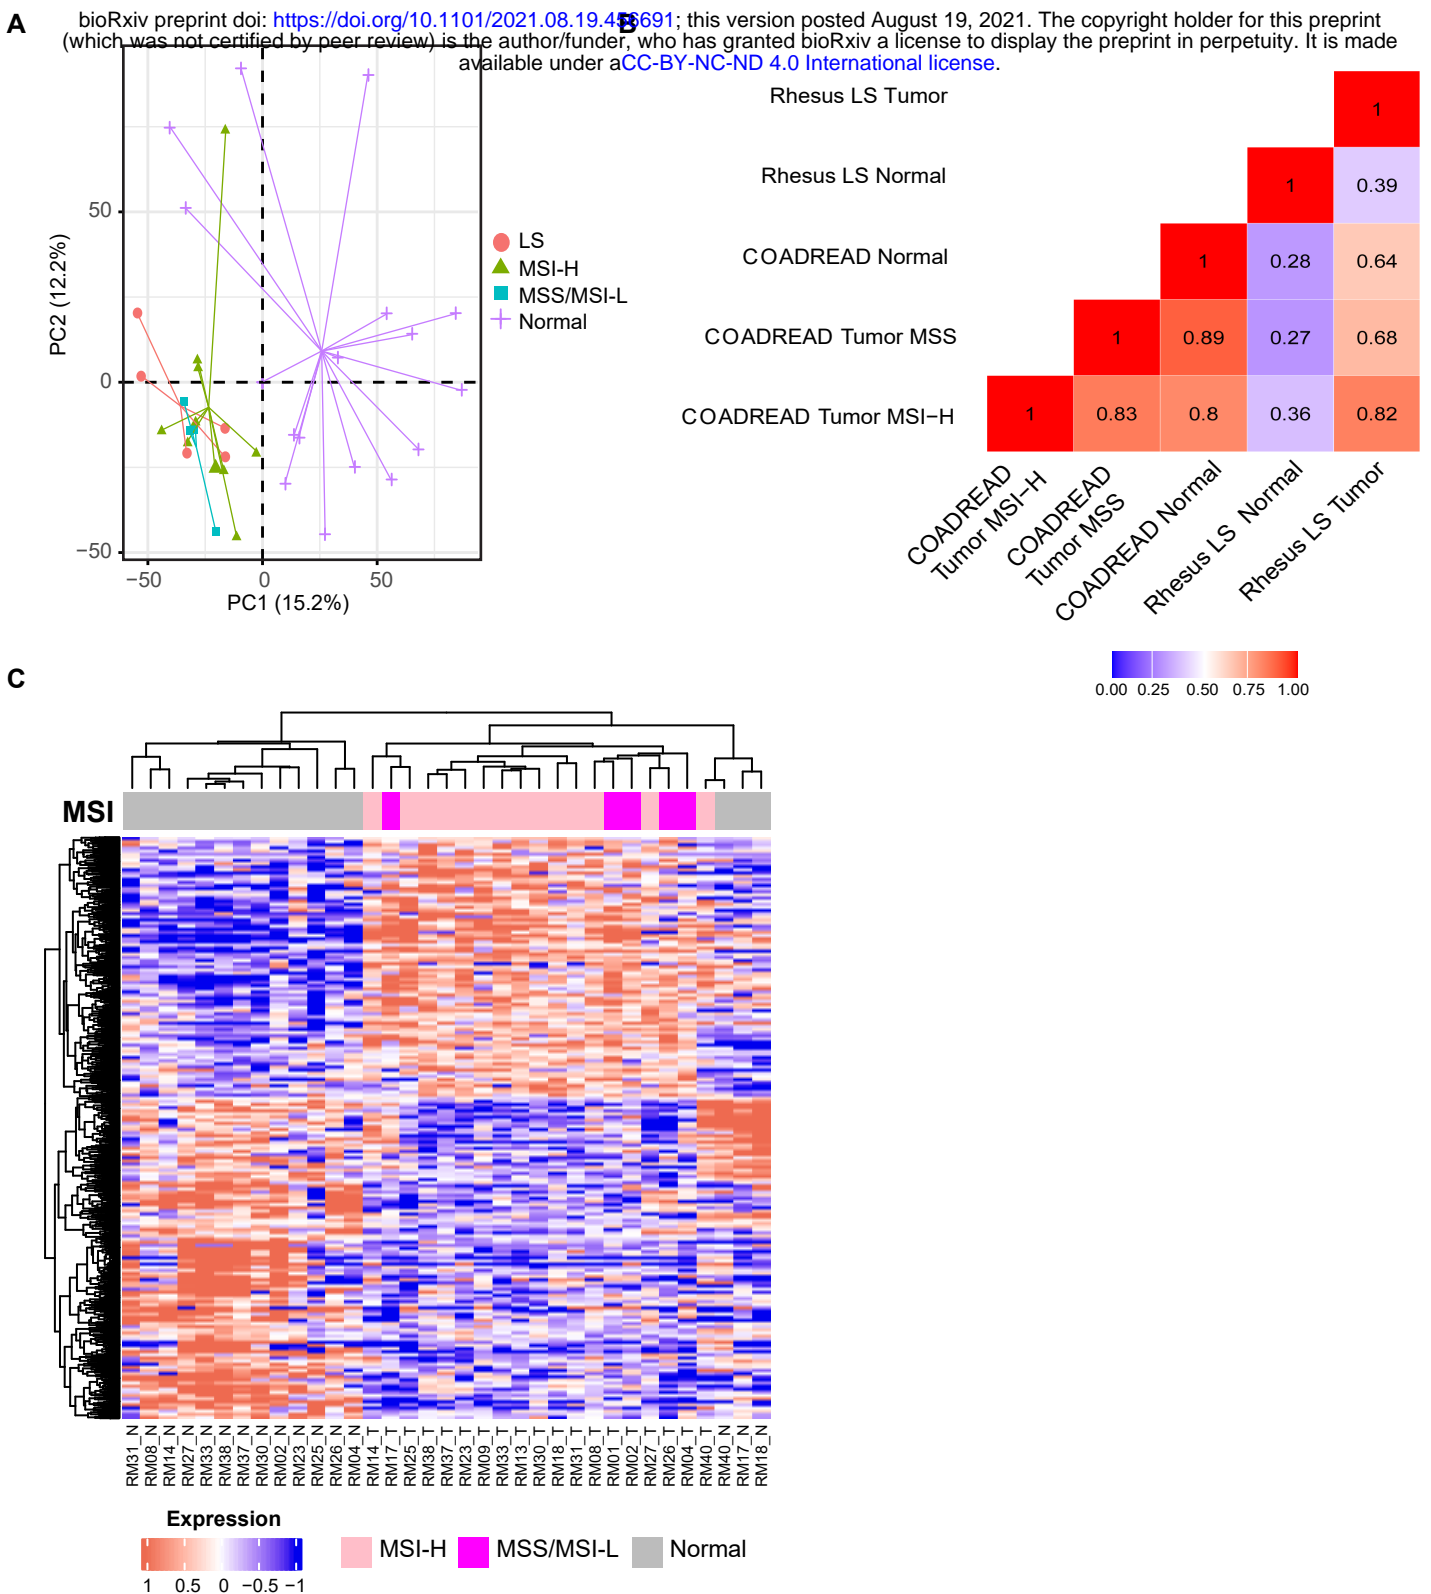

**Figure 4. Transcriptomic analysis of rhesus CRC.** (A) Principal component analysis (PCA) of rhesus CRC showed the trends exhibited by the expression profiles of sporadic MSI-H samples (green triangles), sporadic MSS and MSI-L (blue squares), Lynch syndrome (red circles), and normal tissue (purple plus signs). Normal tissue samples clustered separately from tumor tissue samples; (B) Pearson's correlation coefficient of mean expression levels across 101 significant genes from COADREAD MSI-H tumor samples, COADREAD MSS tumor samples, COADREAD normal tissue samples, rhesus LS tumor samples, and rhesus normal tissue samples; (C) Significant differentially expressed genes (DEGs) between tumor and normal tissue samples. DEGs were found based on BH-adjusted  $P$ -value  $\leq 0.05$  between rhesus colorectal normal and tumor. Pearson's correlation was used to perform hierarchical clustering between rhesus tumor and normal tissue samples. Columns represent samples, and rows represent statistically significant differentially expressed genes. Gray color represents normal, pink MSI-H, and magenta MSS and MSI-L tissue samples.

**Figure 5**

bioRxiv preprint doi: <https://doi.org/10.1101/2021.08.19.456691>; this version posted August 19, 2021. The copyright holder for this preprint (which was not certified by peer review) is the author/funder, who has granted bioRxiv a license to display the preprint in perpetuity. It is made available under a [CC-BY-NC-ND 4.0 International license](https://creativecommons.org/licenses/by-nc-nd/4.0/).

**A**

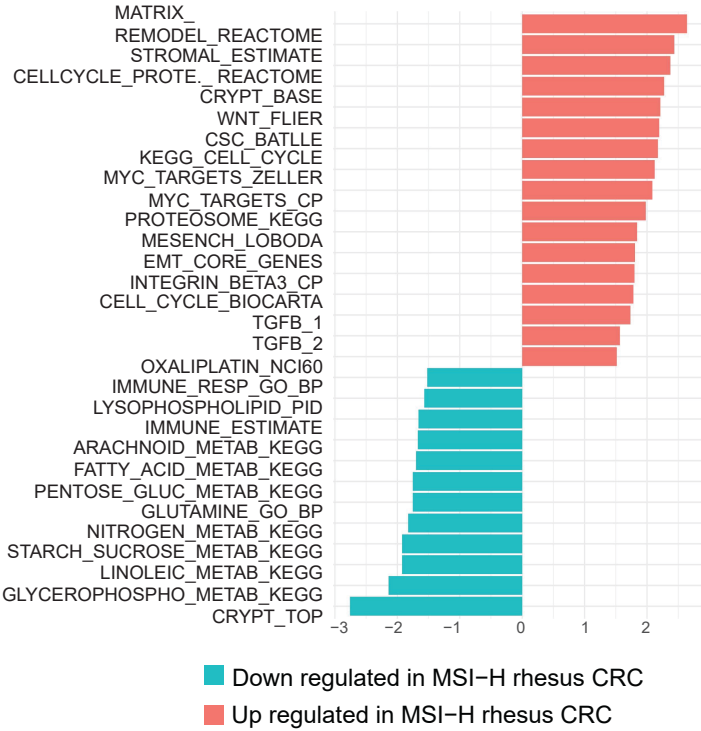

**B**

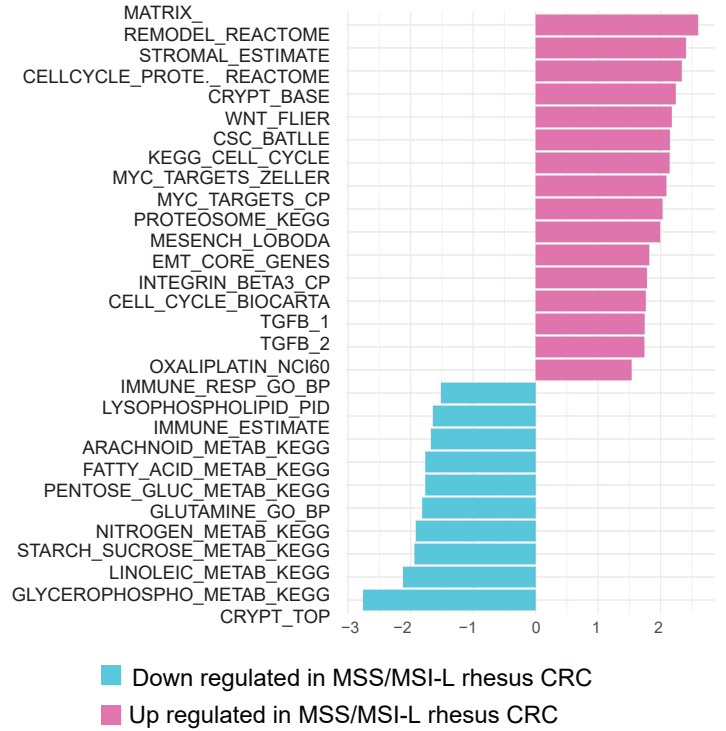

**C**

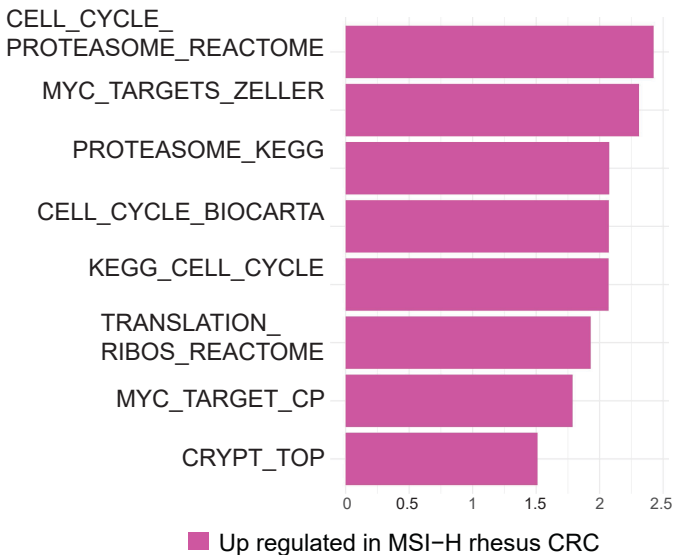

**D**

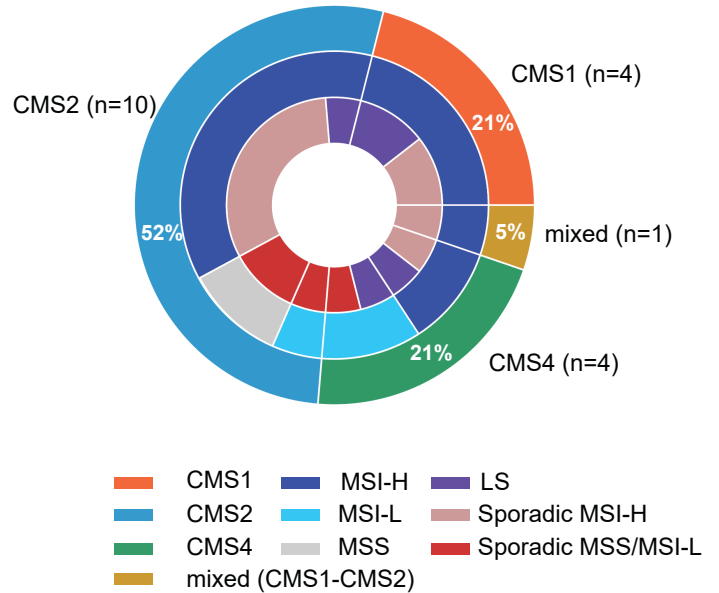

**Figure 5. Gene set enrichment analysis in rhesus CRC.** (A-C) Gene expression pathways are significantly deregulated in rhesus CRC. Pathways relevant to CRC biology are highlighted. BH-adjusted  $P$ -value  $\leq 0.05$  was set as threshold for analysis; (D) CMS classification of rhesus CRC. The outer ring of circos plot represents CMS subtypes present in rhesus CRC with 52% of samples ( $n=10$ ) classifying as CMS2. Middle ring represents MSI status of samples, and inner ring indicates clinical categories of samples.
